# Supplementary material
Source: PubMed Central journal article supplement (PMC2975159)

## Supporting Information

**Figure S1. Amino acid alignment of Vif sequences derived from five major subtypes of HIV-1.** Sequences were aligned using the Clustal W program. Dashes indicate identity with the NL4-3 *vif* sequence.

**Figure S2. Optimization of plasmid DNA doses for transfection.** (A and B) The mRNA levels of APOBEC3G (A) or APOBEC3F (B) endogenously expressed in PBMCs derived from two different donors, and of that expressed in cells transfected with serially diluted APOBEC3G or A108S-V231I polymorphic wild-type APOBEC3F expression plasmid (Kinomoto et al. 2007, Nucleic Acids Res. 35:2955-64) were compared. Using a real-time RT-PCR method as described below, introduction of 25 ng of APOBEC3G or of ~ 0.8 ng of APOBEC3F plasmid into 293T cells (closed red circle) reproduced the endogenous expression levels in PBMCs (upper panel). (C and D) In a parallel experiment, the infectivity of VSV-G-pseudotyped  $\Delta$ vif viruses produced from the transfected cells was examined by infecting 293T cells with the viruses and performing a luciferase assay. (E) Enhancement of virion infectivity by Vif, either from 1  $\mu$ g of the luciferase reporter proviral construct pNL-Luc-E(-) (physiologically expressed Vif, [Tokunaga, et al. 2001, J. Virol., 75:6776-85]) or from the serially diluted Vif expression plasmid coupled with the VSV-G expression plasmid pHIT/G and the Vif-deficient luciferase reporter proviral construct pNL-Luc-F(-)E(-) in the presence of a fixed amount of the APOBEC3G plasmid (25 ng). The optimal dose of the Vif expression plasmid, reflecting its physiological expression, was 8 ng (closed red circle).

[Real-Time RT-PCR] Using the RNAqueous Kit (Ambion), total RNA was extracted from PBMCs from two donors or from 293T cells cotransfected with serially diluted APOBEC3G (200-1.5 ng) or APOBEC3F expression plasmid (200-0.2 ng), 0.1 µg of pHIT/G, 8 ng of NL-Vif expression plasmid, and 1 µg of pNL-Luc-F(-)E(-). Total RNA was treated with TURBO DNA-free (Ambion) according to the manufacturer's protocols. Real-time RT-PCR was performed with Mx3005P (Stratagene) using the QuantiTect Probe RT-PCR (Qiagen) as described previously.

**Figure S3. Further mutational analysis within the N-terminal (1-31) domain of subtype C-derived Vif protein.** (A) N-terminal (1-31) amino acid alignment of Vif proteins expressed from NL4-3 (NL-Vif) and 02ZMDBC33 (DB-Vif) derived from subtypes B and C, respectively. Blue amino acid letters indicate consensus residues of each subtype. K/R in blue at position 17 of the DB-Vif protein shows that either lysine or arginine is conserved in 50% of all subtype C-derived Vif sequences. Asterisk at position 31 of DB-Vif shows that valine is highly conserved specifically in regionally circulating strains of subtype C viruses. (B and C) Functional testing for anti-APOBEC3G activity of the point mutant Vif proteins in the single-round replication assay described in Figure 2B. Results are representative of at least three independent triplicate experiments. RLU: relative light units. Data shown are mean ± SD; \*  $P < 0.01$ ,  $t$ -test.

**Figure S4. Binding activity of chimeric Vif proteins to Cul5 and EloC.** 293T cells ( $7 \times 10^5$ ) were cotransfected using FuGENE6 with 400 ng each of pC-EloC-HA, pC-Cul5,

pC-Vif-FLAG-RRE, pCA-Rev, and empty vector. After 36 h, transfected cells were treated with 20  $\mu$ M of MG-132 (Peptide Institute Inc.) for 9 h, and suspended in 500  $\mu$ l of lysis buffer (50 mM Tris-HCl, pH 7.4, 150 mM NaCl, 0.5% NP-40, 20  $\mu$ M MG-132 and complete protease inhibitor cocktail). The resultant lysates were clarified by brief centrifugation, pre-cleared with 30  $\mu$ l of Protein G-Agarose (Sigma) for 1 h at 4°C, and then incubated with an anti-FLAG M2 Affinity gel. After 1 h at 4°C, the immune complexes were extensively washed with lysis buffer. Equal aliquots of the total and bound fractions were subjected to gel electrophoresis and transferred to a nitrocellulose membrane. The membranes were probed with an anti-HA rabbit polyclonal antibody (to detect EloC) (Sigma), a Cul5 antiserum (Santa Cruz), the anti-FLAG rabbit polyclonal antibody (to detect Vif), or the anti- $\beta$ -actin mouse monoclonal antibody.

**Figure S5. Replication kinetics of Vif recombinant viruses in PBMCs.** PBMC ( $1 \times 10^6$ ) were infected overnight with 50 ng of p24 antigen of NL-WT, NL-DBvif, NL-DB(1-31)vif, or NL- $\Delta$ vif viruses, washed extensively with PBS, and then cultured in fresh medium. Supernatants were sampled every 3 d, and p24 Gag antigen production was quantified by ELISA.

Figure S1

|               |      |             |                |            |             |             |             |             |            |               |            |     |
|---------------|------|-------------|----------------|------------|-------------|-------------|-------------|-------------|------------|---------------|------------|-----|
| NL4-3         | 1:   | MENRWQVMIV  | WQVDRMRINT     | WKRLVKHHMY | ISRKAKDFWY  | RHHYESTNPK  | ISSEVHIPLG  | DAKLVIITTYW | GLHTGERDWH | LGQGVSIIEWR   | KKRYSTQVDP | 100 |
| JRFL          | 1:   | -----R      | --S-----       | T-G--G-I   | -----H-R    | -----       | --R-----    | -----       | -----V---  | ---N-----     | -----      | 100 |
| SF2           | 1:   | -----R      | --S-----       | --K--G--   | -----H-R    | V-----      | -----       | -----E--    | -----A---  | --K-----      | -----      | 100 |
| BaL           | 1:   | -----RA     | --S-----       | -TG--G--   | -----H-R    | -----R      | --E-----    | -----       | -----      | -----         | -----      | 100 |
| 01JPDPRDR3884 | 1:   | -----R      | --S-----       | --K--G-V-  | -----R      | -----       | -----A--    | -----       | -----      | -----T--N--G- | -----      | 100 |
| UG029-A3      | 1:   | -----R      | --NS-----      | V-K--G--   | -----NH-R   | V-----      | --R--VR--   | -----K--Q   | --H-----   | L-----I--     | -----      | 100 |
| UG031-A1      | 1:   | -----K      | --NS-----      | --K--NG--  | -----RH--   | V-----      | E--I-VK--   | -----K--Q   | --H-----   | L-S-N--L--    | -----      | 100 |
| UG031-A2      | 1:   | -----K      | --NS-----      | --K--NG-S- | -----RH--   | V-----      | --RI-VR--   | -----K--Q   | --H-----   | L-----LN-     | -----      | 100 |
| 92RW025A      | 1:   | -----R      | --NS--Y---     | V-K--RK-L- | -----D-RH-- | V-----      | --R--VR--   | -----K--Q   | --H-----   | LR-----I--    | -----      | 100 |
| 92UG037       | 1:   | -----R      | --NS-----      | --R--G--   | -----RH--   | V-----      | --RI-VR--   | -----Q--K-- | --H-----   | L-----I--     | -----      | 100 |
| 02ZMJCC05     | 1:   | -----L--    | --K-R--        | --NS-----  | V-KR--G--   | --F--RH-R   | V-----      | --R-IVK--   | --Q-----   | --H-----      | LR-----    | 100 |
| 02ZMJMC18     | 1:   | -----L--    | --K-R--        | --NS-----  | V-KR--G--   | --F--RH-R   | V-----      | --R-IVK--   | --Q-----   | --H-----      | LR-----    | 100 |
| 02ZM109C31    | 1:   | -----L--    | --K-K--        | --NS-----  | V-KR-NG--   | -----RH--   | V-----      | --R--K--    | --QP-----  | --H-----      | LR-----IE- | 100 |
| 02ZM112C23    | 1:   | -----L--    | --K-K--        | --NS-----  | V-KR-NG--   | -----RH--   | V-----      | --R--K--    | --QS-----  | --H-----      | LR-----IE- | 100 |
| 02ZMDBC33     | 1:   | -----L--    | --K-K--        | --NS-----  | V-KR-NG--   | -----RH--   | V-----      | --R--K--    | --QP-----  | --H-----      | LR-----IE- | 100 |
| 02ZMGNC46     | 1:   | -----L--    | --I--R--       | --NS-----  | V--R-SG--   | -----RH--   | V-----      | --R--K--    | --Q-----   | --H-----      | L-----     | 100 |
| 93TH051       | 1:   | -----R      | --NS-----      | --K--K--   | -----QH--   | V-----      | E-R--R--    | --Q--K--Q   | --H-----   | QRQ---I--     | -----      | 100 |
| 93TH057AE18   | 1:   | -----R      | --NS-----      | --K--K--   | -----QH--   | V-----      | E-R--R--    | --Q--K--Q   | --H-----   | QRN---I--     | -----      | 100 |
| 93TH060       | 1:   | -----R      | --NS-----      | --K--K--   | -----QH--   | V-----      | E-R--R--    | --Q--K--Q   | --H-----   | QRT---I--     | -----      | 100 |
| 93TH062       | 1:   | -----R      | --NS-----      | --K--K--   | -----QH--   | V-----      | E-R--R--    | --Q--K--Q   | --H-----   | QRE---I--     | -----      | 100 |
| 93TH065       | 1:   | -----R      | --NSI-----     | --K--K--   | -----QH--   | V-----      | E-R--R--    | --Q--K--Q   | --H-----   | QRT---I--     | -----      | 100 |
| 03GH178AG1    | 1:   | -----R      | --NS-----      | -----G--   | --H-CKH--   | A-----      | --R--VR--   | -----       | --H-----   | K             | QRK---I--  | 100 |
| 03GH180AG13   | 1:   | -----K-R    | --NS-----      | V-K-----   | --F--GH--   | A-----      | --R--VR--   | --N-----    | --H-----   | QR            | ---I--     | 100 |
| GH184AG25     | 1:   | -----R-K    | --NS--Y---     | -----Y-    | --RH-R      | V-----      | --R-IVR--   | -----       | --H-----   | K             | Q-----I--  | 100 |
| GHNJ188       | 1:   | -----V--    | --NS-----H     | --K--G--   | --H--RH--   | --C-----    | --M-IVR--   | -----       | --H-----   | Q             | -----I--   | 100 |
| 97GH_AG2      | 1:   | -----I--K-  | --NS-----      | --K--G--   | -----RH--   | V-----      | --R--VR--   | -----       | --H-----   | QR            | -----      | 100 |
|               |      |             |                |            |             |             |             |             |            |               |            |     |
| NL4-3         | 101: | DLADQLIHLH  | YDFCFSESAI     | RNTILGRIVS | PRCEYQAGHN  | KVGSLLQYLAL | AALIKPKQIK  | PPLPSVRKLT  | EDRWNKPKQT | KGHRGSHTMN    | GH         | 192 |
| JRFL          | 101: | -----Y      | -----H--       | -----      | -----       | -----       | T---S-K--   | -----K--    | -----      | -----         | ---        | 192 |
| SF2           | 101: | G-----      | -----K-A--YR-- | -----      | -----       | -----       | ---T--KT-   | -----K--    | -----      | -----         | ---        | 192 |
| BaL           | 101: | N-----      | -----Y         | -----A     | -----       | -----       | ---VT-K-R   | -----T--    | -----I     | -----         | ---        | 192 |
| 01JPDPRDR3884 | 101: | -----K----- | H-----D--      | -HAL--V-R  | SK-----     | --E-----    | T---T--K--  | -----K--    | -----      | --R--R-V-     | ---        | 192 |
| UG029-A3      | 101: | -----I-     | -----D--       | -KA-V-QV-  | -----T--    | -----       | K--VT-PRR-  | -----R--    | -----      | --P-----      | -C         | 192 |
| UG031-A1      | 101: | -----RR     | -----D--       | -KA--QV-N  | -S---T--    | -----       | K--VT-TRT-  | -----A      | -----      | R-P-----      | -C         | 192 |
| UG031-A2      | 101: | -----VY     | -----          | -KA--RQV-  | -S---T--    | -----       | K--VT-TRT-  | -----A      | -----      | R-P-----      | -C         | 192 |
| 92RW025A      | 101: | -----       | -----          | -RA--QV-   | --V-PT--    | Q-----      | K--VT-IKTR- | -----KI--   | -----      | R---N----     | -C         | 192 |
| 92UG037       | 101: | -----       | --N--D--       | -KA--QV-   | --D--T--    | -----       | K--VT-SR--  | -----K--A   | -----R--   | R---E----     | -C         | 192 |
| 02ZMJCC05     | 101: | S-----M-    | -----AD--      | -KA--H--   | -----D--    | -----       | T-----KR-   | -----S--V   | --N-----   | RDR--N----    | --         | 192 |
| 02ZMJMC18     | 101: | S-----M-    | -----AD--      | -KA--H--   | -----D--    | -----       | T-----KR-   | -----S--V   | -----R-    | RDR--N----    | --         | 192 |
| 02ZM109C31    | 101: | G-----V-    | -----AD--      | -KA--H--T  | --D-----S   | Q-----      | T-----RK--  | -----V      | -----NL-R- | --R--N----    | --         | 192 |
| 02ZM112C23    | 101: | G-----V-    | -----AD--      | -KA--H--T  | --D-----S   | Q-----      | T-----RK--  | -----V      | -----NL-R- | R-R--N----    | --         | 192 |
| 02ZMDBC33     | 101: | G-----V-    | -----AD--      | -KA--H--T  | --D-----S   | Q-----      | T-----RK--  | -----V      | -----NL-R- | R-R--N----    | --         | 192 |
| 02ZMGNC46     | 101: | G-----M-    | -----AD--      | -KA--H--T  | --D-----S   | Q-----      | T-----KR-   | -----V      | --N-----   | R-R--N----    | --         | 192 |
| 93TH051       | 101: | -----       | --E--D--       | -KA--QV-R  | R---PS--    | -----       | K--TT--R-R  | -----K--    | -----E--I  | R---ENP---    | --         | 192 |
| 93TH057AE18   | 101: | ---R---Q    | -----D--       | -RA--QV-R  | R---PS--    | -----       | K--TT--R-R  | -----K--    | -----I     | W---ENP---    | --         | 192 |
| 93TH060       | 101: | -----Q      | -----D--       | -RA--QV-R  | R---PS--    | -----       | K--TT--R-R  | -----K--    | -----I     | RD---EYP---   | --         | 192 |
| 93TH062       | 101: | -----       | -----D--       | -KA--QV-R  | C---PS--    | -----       | K--TT--R-R  | -----K--    | -----E-R-I | R---ENP---    | --         | 192 |
| 93TH065       | 101: | -----Q      | -----D--       | -KA--QV-R  | R---PS--    | -----       | K--TT--R-R  | -----K--    | -----I     | RD---EYP---   | --         | 192 |
| 03GH178AG1    | 101: | -----Y      | -----D--       | -KA--QV-I  | -K-----     | -----       | K--VT-TRK-  | -----A      | --N-----   | R-----RS-     | --         | 192 |
| 03GH180AG13   | 101: | -----Y      | -----          | -KA--QV-R  | -S-----S    | -----       | K--VA-TRR-  | -----K--I   | -----I     | R-----RPI-    | -R         | 192 |
| GH184AG25     | 101: | -----Y      | -----          | -KA--QV-R  | -K-----     | -----       | K--VA-PR-   | -----       | -----      | RD-----RS-    | --         | 192 |
| GHNJ188       | 101: | -----K      | -----D--       | -RA--QV-   | -----F--    | -----       | K--V-QPRR-  | -----       | --N-----   | R-----S--     | --         | 192 |
| 97GH_AG2      | 101: | -----H      | -----D--       | -KA--EV-   | --Q-PE--    | -----       | K--VT-TKT-  | -----K--    | -----      | R-----RP-     | --         | 192 |

Figure S2

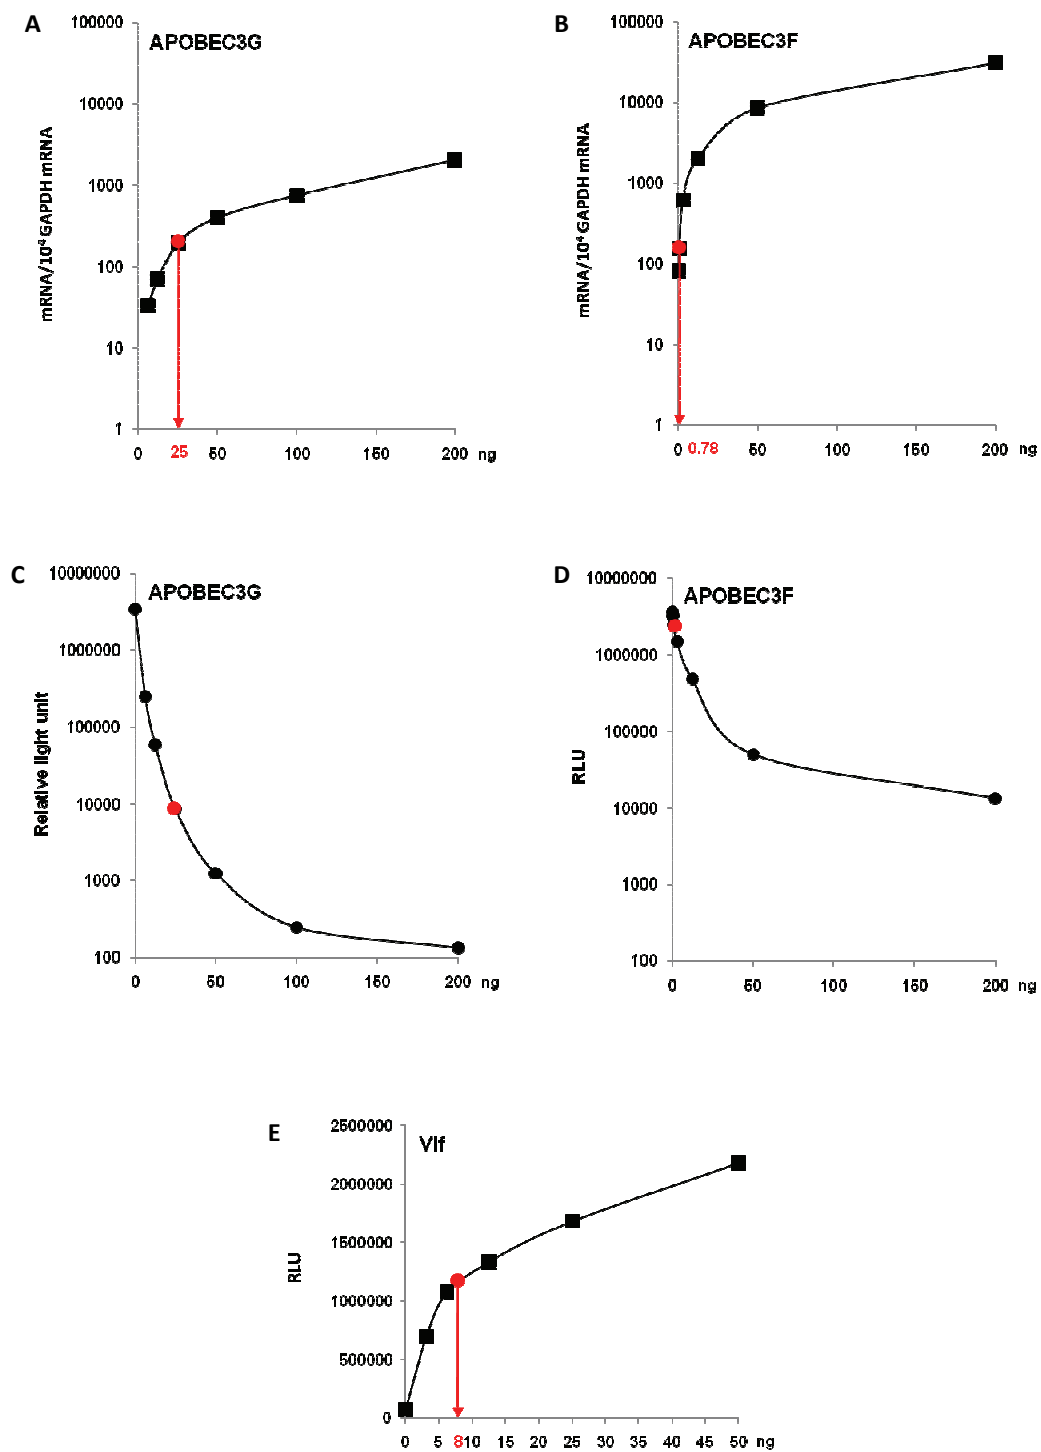



Figure S4

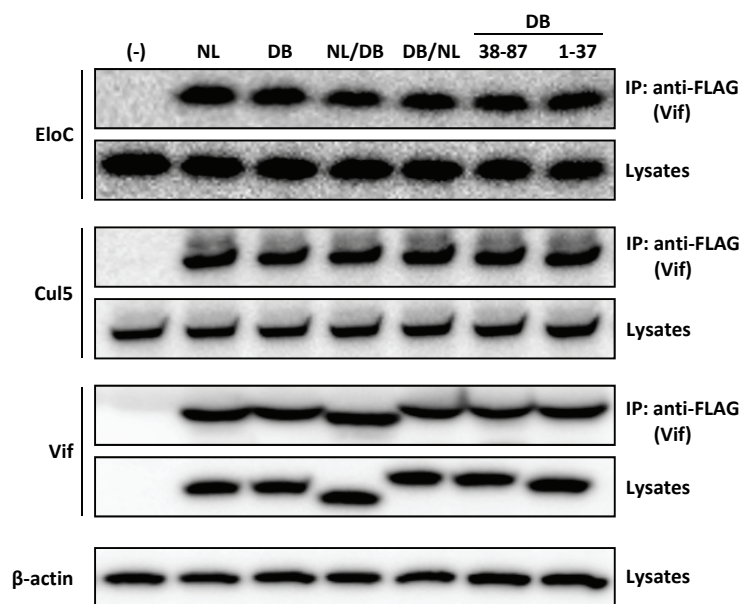

Figure S5

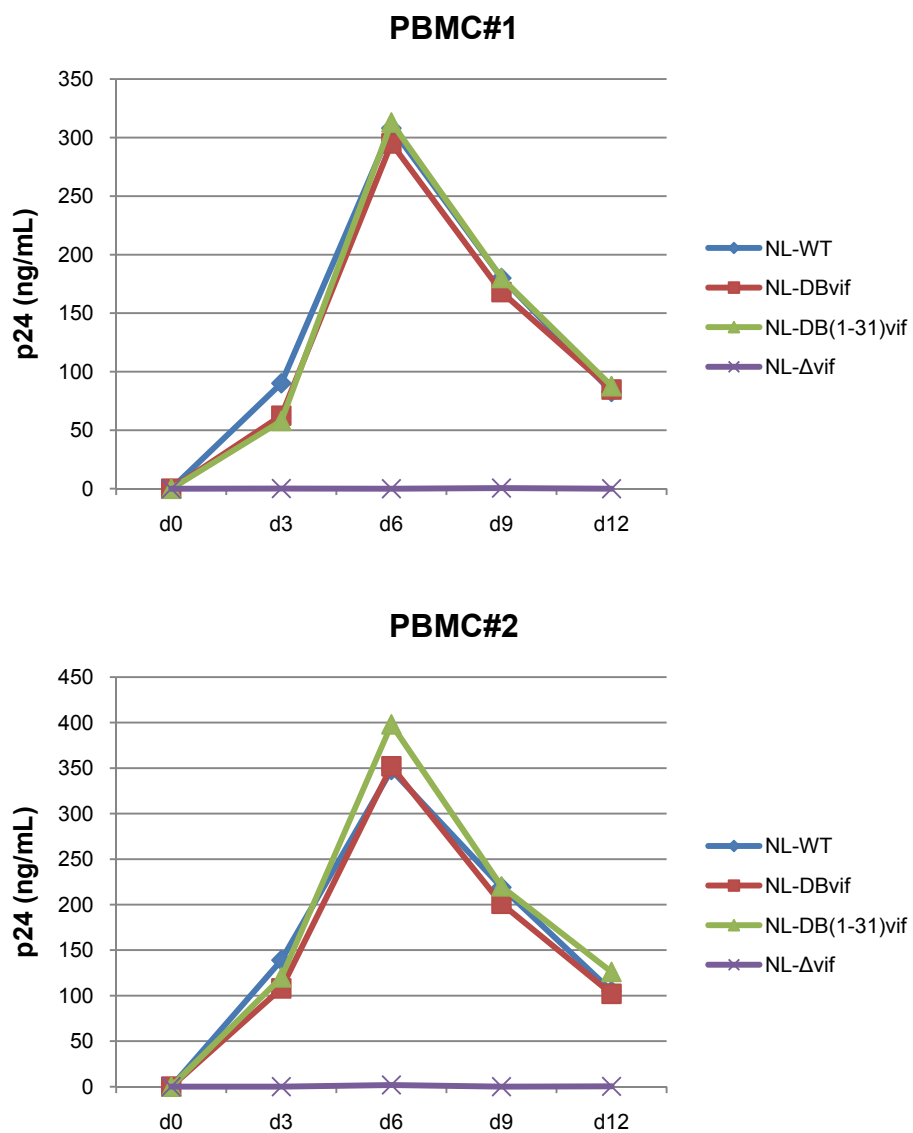

Supplement: supp_M110.173286_jbc.M110.173286-1.pdf [file supp_M110.173286_jbc.M110.173286-1.pdf]
